# Supplementary material for: Impact of Acid-Base Status on Mortality in Patients with Acute Pesticide Poisoning
Source: PubMed Central journal article supplement (PMC7911411; doi:10.3390/toxics9020022), 2021-01-23
Supplement: toxics-09-00022-s001.pdf [file toxics-09-00022-s001.pdf]

# Supplementary Materials: Impact of Acid-Base Status on Mortality in Patients with Acute Pesticide Poisoning

Hyo-Wook Gil <sup>1</sup>, Min Hong <sup>2</sup>, HwaMin Lee <sup>2</sup>, Nam-jun Cho <sup>1</sup>, Eun-Young Lee <sup>1</sup> and Samel Park <sup>1,\*</sup>

**Table S1.** A detailed representation of the “other” pesticides group.

| Other Pesticides                                                              | Count | Other Pesticides                   | Count |
|-------------------------------------------------------------------------------|-------|------------------------------------|-------|
| abamectin                                                                     | 1     | fertilizer                         | 4     |
| acequinocyl                                                                   | 1     | fungicide                          | 6     |
| acetanilide                                                                   | 1     | imidazole                          | 1     |
| acetylaniline                                                                 | 1     | kasugamycin                        | 1     |
| adhesive_agent                                                                | 4     | lambda_cyhalothrin                 | 1     |
| alryoxylcarboxide                                                             | 1     | linuron                            | 1     |
| amide                                                                         | 2     | lufenuron                          | 2     |
| anilin                                                                        | 1     | neonicotinoid                      | 5     |
| antibiotics                                                                   | 11    | niacin                             | 3     |
| arsenic                                                                       | 1     | oxadiazole                         | 5     |
| aryloxyphenopropionate                                                        | 1     | permethrin                         | 1     |
| benzobicyclon                                                                 | 1     | phenoxy                            | 15    |
| benzohydrazide                                                                | 3     | polyoxyethylene methylpolysiloxane | 1     |
| bistrifluron                                                                  | 1     | pyrol                              | 1     |
| blend of alkalaryl polyethoxylate and sodium salt of alkyl sulfonate alkylate | 2     | sethoxydim                         | 1     |
| buprofezin                                                                    | 2     | sulfonylurea                       | 2     |
| cartal hydrochloride                                                          | 2     | sulfoxaflor                        | 1     |
| chlorfenapyr                                                                  | 2     | sulfoxmine                         | 1     |
| chloroacetamide                                                               | 17    | sulfur                             | 1     |
| chloronicotinyll                                                              | 9     | sulfuryl_fluoride                  | 5     |
| chlorophenoxy                                                                 | 1     | tetramicacid                       | 3     |
| chlorothalonil                                                                | 1     | tetrazolinone                      | 1     |
| coumarin                                                                      | 15    | tetrazolium_oxide                  | 1     |
| diamide                                                                       | 5     | tiadinil                           | 1     |
| diazine                                                                       | 1     | triazole                           | 2     |
| diethyltoluamide                                                              | 1     | tricyclzaole                       | 2     |
| dinitroaniline                                                                | 23    | urea                               | 6     |
| emamectin                                                                     | 2     | unknown                            | 22    |
| endosulfan                                                                    | 2     | Total                              | 211   |
